# Supplementary material
Source: Springer Nature journal article supplement (https://www.springermedizin.de/resource/supplementary/13075_2013_4254_MOESM6_ESM.pdf/9696202)

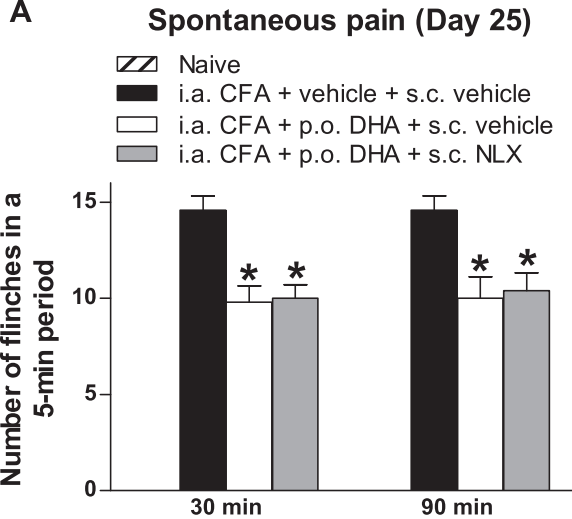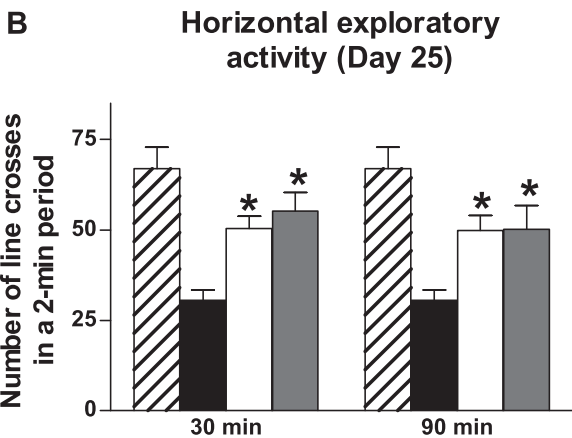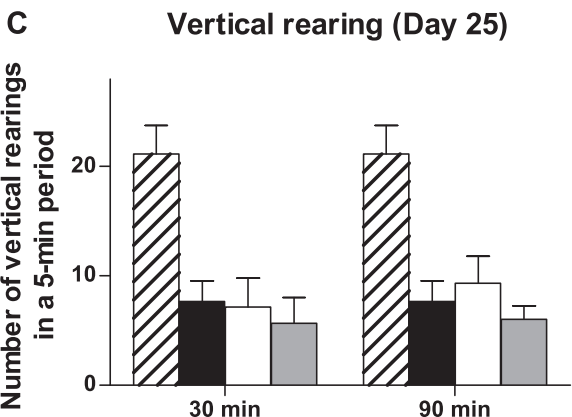

Supplement: MOESM6 [file 9696202]
